# Supplementary material
Source: PubMed Central journal article supplement (PMC2610525)
Supplement: M806068200_1.pdf [file M806068200_1.pdf]

**The Role of the Cytoplasmic Heme-binding protein (PhuS) of *Pseudomonas aeruginosa* in Intracellular Heme Trafficking and Iron homeostasis.** A. P. Kaur, I. B. Lansky and A. Wilks

**Supplementary Materials**

*Extraction of 4-hydroxy-2-alkyl quinolines (HAQs) and analysis by HPLC and mass spectrometry-* HAQs were extracted and analyzed from cultures at the time of sampling for microarray i.e. O.D.<sub>600</sub> of 1.5 and 3.0 as described previously (1). Briefly, 10 ml of culture was centrifuged at 15,000 × g for 15 min, the supernatant passed through a 0.2 μm filter and extracted three times with 5 ml of acidified ethyl acetate. Following extraction, the solvent was evaporated, and the resulting residue was dissolved in 200 μl of acetonitrile containing 0.1% acetic acid. Reverse phase HPLC (Waters Associates) was performed on a 3.0 x 250 mm C18 column (Atlantis™ dC18 5μm) using a modification of a previously described procedure (2). Samples were analyzed over a 60 min linear 30 to 100% gradient of acetonitrile containing 0.1% acetic acid. The column was re-equilibrated with 100% acetonitrile containing 0.1% acetic acid for 3 min and returned to 30% acetonitrile containing 0.1% acetic acid for a further 10 min at a constant flow rate of 0.3 ml/min. The elution profile was monitored at 330 nm and the major peaks collected and analyzed on a Finnigan LCQ classic ion-trap Mass Spectrometer (Finnigan MAT, San Jose, CA) equipped with an ESI source. The MS instrument was operated in a positive-ion mode with Finnigan Xcalibur software 1.1. The spectra were obtained in full scan mode (150-350 *m/z*). The collision energy for collision induced dissociation was set to 35 eV. As a control, a PQS standard (a gift from Dr. Susanne Häussler) was subjected to the same separation and analysis to confirm the presence of PQS as the major product.

*Real-time PCR assays-*To determine the validity of the microarray data, changes in transcript level observed on microarray analysis were validated by quantitative real-time PCR (qRT-PCR). Genes and primer sequences utilized for the analysis are listed in the Supplementary data (Table S1). The RT-PCR was performed on a Biorad iCycler with the iScript cDNA Synthesis Kit and iQ SYBR Green Supermix kit (BioRad Laboratories, Inc., Hercules, CA) according to the manufacturer's instructions. All reactions were normalized to the *rpoD* gene encoding the principle sigma factor,  $\sigma^{70}$  (3). The relative change in transcript levels were determined according to the  $2^{-\Delta\Delta C_T}$  procedure (4). The melt-curve analysis was performed to evaluate PCR specificity.

Supplementary Table S1. List of primers used for RT-PCR.

| <b>Gene</b>  | <b>Sense Primer</b>   | <b>Anti-sense Primer</b> |
|--------------|-----------------------|--------------------------|
| <i>lecB</i>  | TTCGCCCTGGTCGGCTC     | CCGAGCGGCCAGTTGATC       |
| <i>mexG</i>  | CTGGACCGCAAGCTATGGC   | AGAAGGTGTGGACGATGAGGAT   |
| <i>mexR</i>  | AACTACCCCGTGAATCCCGA  | GCTCGCTCTGGATGCGC        |
| <i>pchR</i>  | GCGATGCAGGCGTTGGC     | CTCGCCGGAAAGGAACTGTG     |
| <i>phnA</i>  | CGTTGAGCGAGGACTGTCC   | CCCAGCGTTCCGAGCAC        |
| <i>phzA1</i> | TCGAGGACGGCTGCGC      | CGTTGTGCCACTCCCAGTC      |
| <i>phzG2</i> | GCCGCCCGTACCAGACC     | TCGTGCAGCCGCTCGG         |
| <i>pqsA</i>  | GCCATTCCCGCCGTGATC    | CGCCAAAGGACCGCTCAG       |
| <i>pqsE</i>  | GGATGATGACCTGTGCCTGTT | CCTTCAACCAGCGCCCAG       |
| <i>pvdS</i>  | CTTCGAGATGTACCGCCTGC  | CGTCGCGGATCATGAAGTTGA    |
| <i>tonB</i>  | CCGCCGAAGATCGAGGAAC   | GGCTGGGCTGGCTGGAT        |

Supplementary Table S2. Validation of the microarray analysis by RT-PCR.

| <b>Gene</b>  | <b>Fold change by RT-PCR<sup>a</sup></b> | <b>Fold change by microarray<sup>b</sup></b> |
|--------------|------------------------------------------|----------------------------------------------|
| <i>lecB</i>  | 9.2 ± 1.6                                | 15.6 ± 0.03                                  |
| <i>mexG</i>  | 89.5 ± 3.1                               | 81.9 ± 0.03                                  |
| <i>mexR</i>  | 4.3 ± 0.04                               | 4.90 ± 0.04                                  |
| <i>pchR</i>  | 6.3 ± 0.7                                | 4.02 ± 0.03                                  |
| <i>phnA</i>  | 13.7 ± 1.9                               | 10.0 ± 0.26                                  |
| <i>phzA1</i> | 34.9 ± 3.6                               | 40.3 ± 0.05                                  |
| <i>phzG2</i> | 22.0 ± 2.3                               | 23.1 ± 0.20                                  |
| <i>pqsA</i>  | 12.8 ± 0.9                               | 10.2 ± 0.23                                  |
| <i>pqsE</i>  | 7.3 ± 0.05                               | 6.9 ± 0.29                                   |
| <i>pvdS</i>  | 20.05 ± 4.8                              | 13.5 ± 0.05                                  |
| <i>tonB</i>  | 2.89 ± 0.59                              | 4.2 ± 0.05                                   |

(a) The fold change values were calculated according to the  $2^{-\Delta\Delta C_T}$  procedure (4). Values represent the mean of three experiments ± standard errors.

(b) The fold change was calculated as described in materials and methods. A positive value indicates the up-regulation and a negative value the down-regulation of a transcript in the *phuS* mutant. The values are shown with standard errors. Each mean was calculated from three separate microarray experiments for the wild type and *phuS* mutant.

A            IA614    IA614    IR1648    IR1648  
                 - $\Delta$ phuS                    - $\Delta$ phuS

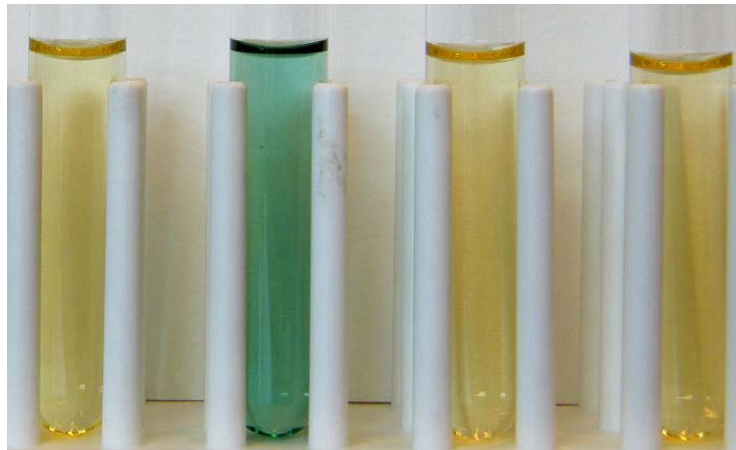

B

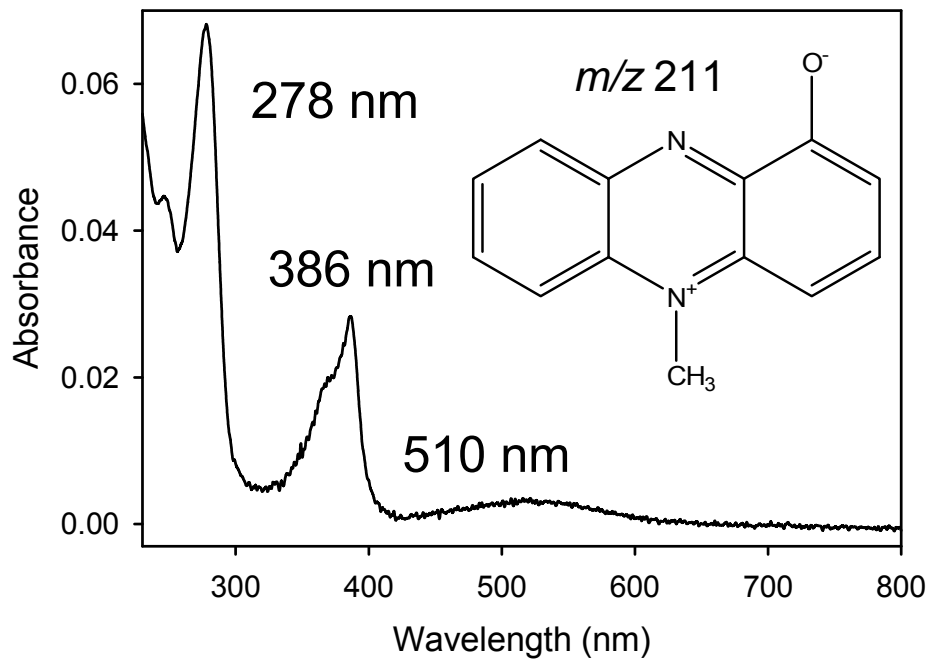

Fig. S1. *Pyocyanin production in the P. aeruginosa isogenic wild type IA614 and mutant strains.* (A) Cell free LB-media from 24 hour cultures. (B) UV-visible spectrum of pyocyanin in 0.2 N HCl. Inset; chemical structure of pyocyanin and the mass as calculated by ESI-MS.

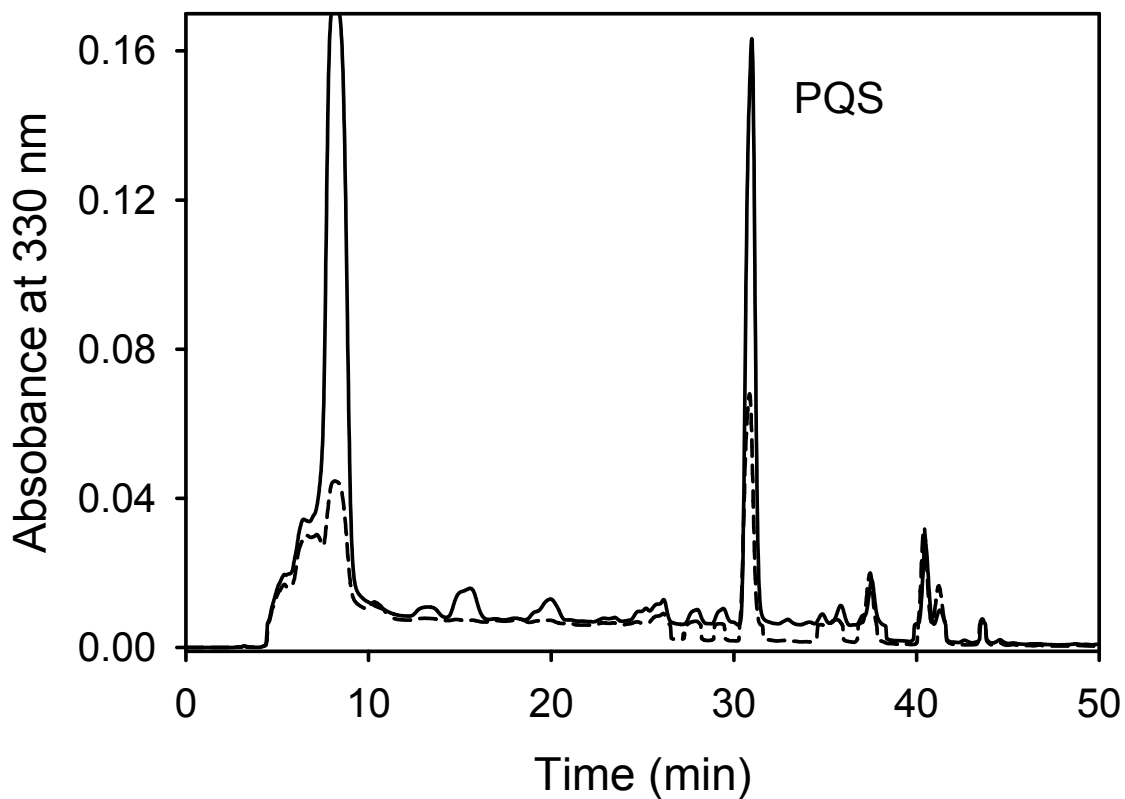

Fig. S2. HPLC analysis of extracted 4-hydroxy-2-alkyl quinolines from the wild type MPAO1. (----) and the 7520 *phuS::Tn* (—) mutant. The samples were extracted from media following pelleting of the cells from cultures grown to an O.D.<sub>600</sub> of 1.5.

#### REFERENCES

1. Deziel, E., Lepine, F., Milot, S., He, J., Mindrinos, M. N., Tompkins, R. G., and Rahme, L. G. (2004) *Proc Natl Acad Sci U S A* **101**(5), 1339-1344
2. Lepine, F., Deziel, E., Milot, S., and Rahme, L. G. (2003) *Biochim Biophys Acta* **1622**(1), 36-41
3. Savli, H., Karadenizli, A., Kolayli, F., Gundes, S., Ozbek, U., and Vahaboglu, H. (2003) *Journal of medical microbiology* **52**(Pt 5), 403-408
4. Livak, K. J., and Schmittgen, T. D. (2001) *Methods (San Diego, Calif)* **25**(4), 402-408
